# Supplementary material
Source: publisher figshare collection journal article supplement (https://gsapubs.figshare.com/articles/dataset/_/12541082)
Supplement: Supplementary file 1 [file 1]

Wu, C., Zuza, A.V., Zhou, Z., Yin, Z., McRivette, M.W., Chen, X., Ding, L., and Geng, J., 2019, Mesozoic-Cenozoic evolution of the Eastern Kunlun Range, central Tibet, and implications for basin evolution within the Indo-Asian collision: Lithosphere, <https://doi.org/10.1130/L1065.1>.

2019162\_Tables S1-S4.xls contains the following:

- Table S1. Summary of sample locations and their corresponding site numbers shown in Figures 3, 11 and 12
- Table S2. Modal composition of the sandstone samples in this study.
- Table S3. Zircon U–Pb isotopic data for the sandstone samples from this study.
- Table S4. Apatite fission track analytical results for the Eastern Kunlun Range in this study Track densities are (x106 tr cm-2) and the numbers of tracks counted (N) shown in brackets

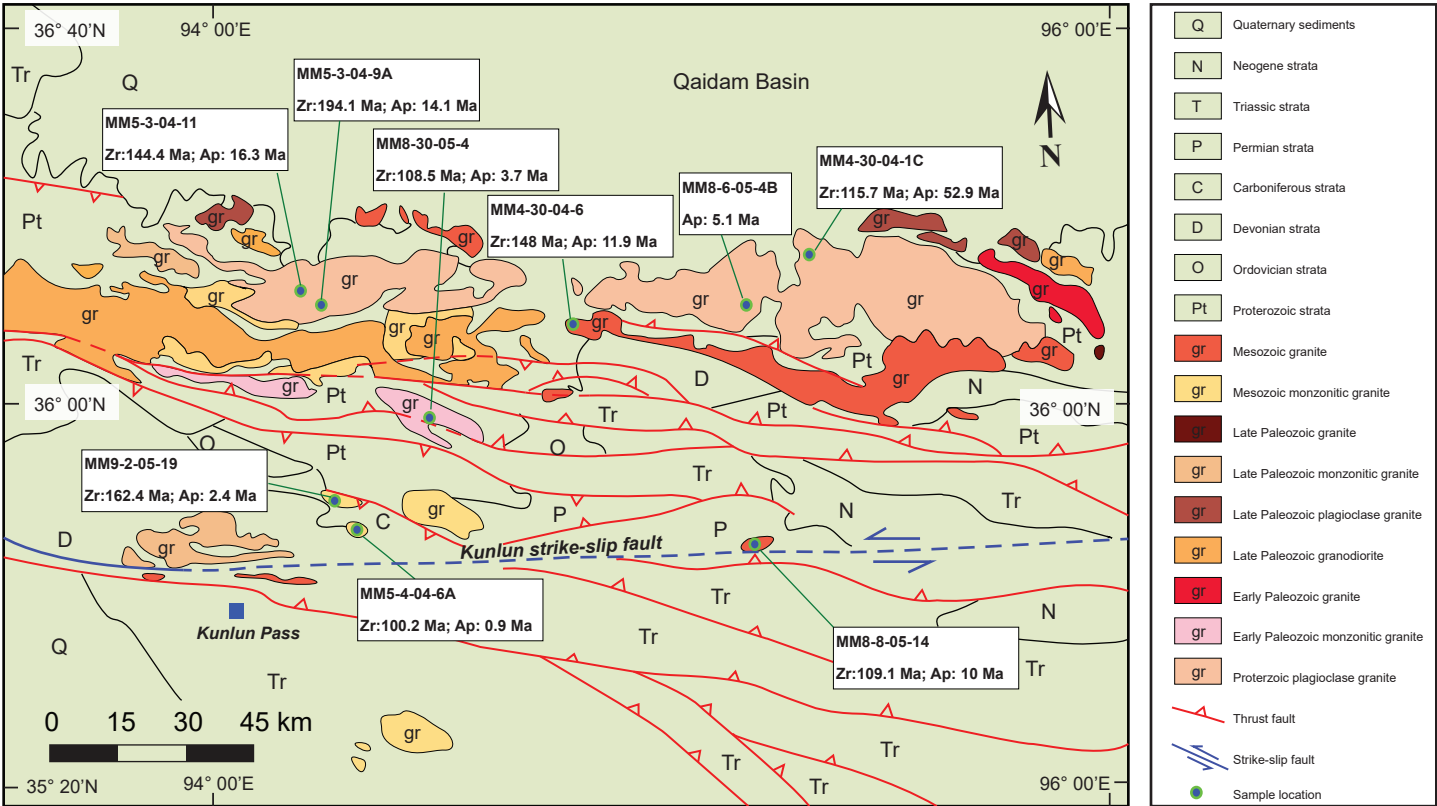

Wu et al. Fig.S1
